# Supplementary material
Source: publisher figshare collection journal article supplement (https://rs.figshare.com/ndownloader/files/21888609)
Supplement: Supplementary file 1 [file 21888609]

* Encoding: UTF-8.

MIXED F0erb BY Sex VocalTypeLabel
  /CRITERIA=CIN(95) MXITER(100) MXSTEP(10) SCORING(1) SINGULAR(0.000000000001) HCONVERGE(0, 
    ABSOLUTE) LCONVERGE(0, ABSOLUTE) PCONVERGE(0.000001, ABSOLUTE)
  /FIXED=Sex VocalTypeLabel Sex*VocalTypeLabel | SSTYPE(3)
  /METHOD=REML
  /RANDOM=INTERCEPT | SUBJECT(Vocaliser_ID) COVTYPE(VC)
  /EMMEANS=TABLES(Sex) COMPARE ADJ(SIDAK)
  /EMMEANS=TABLES(OVERALL)
  /EMMEANS=TABLES(VocalTypeLabel) COMPARE ADJ(SIDAK)
  /EMMEANS=TABLES(Sex*VocalTypeLabel) .
